# Supplementary material for: Synergistic role of hydrogen bonding and band degeneracy leads to enhanced X-ray detection in HPIP-(NH4)0.7Cs0.3Br3·H2O perovskites
Source: Royal Society of Chemistry journal article supplement (doi:10.1039/d4qi00272e), 2024-01-01
Supplement: d4qi00272e1.pdf [file d4qi00272e1.pdf]

## Supporting information

### **Synergistic Role of Hydrogen bond and Band degeneracy Leads to Enhanced X-ray Detection in HPIP-(NH<sub>4</sub>)<sub>0.7</sub>Cs<sub>0.3</sub>Br<sub>3</sub>•H<sub>2</sub>O Perovskites**

*Pengxiang Dong<sup>†, ‡</sup>, Chensheng Lin<sup>†</sup>, Xin Zhao<sup>†</sup>, Yicong Lv<sup>†</sup>, Ning Ye<sup>§</sup> and Min Luo<sup>\*, †</sup>*

<sup>†</sup>Key Laboratory of Optoelectronic Materials Chemistry and Physics, Fujian Institute of Research on the Structure of Matter, Chinese Academy of Sciences, Fuzhou, Fujian 350002, China.

<sup>‡</sup>School of Physical Science and Technology, ShanghaiTech University, Shanghai, 201210, China.

<sup>§</sup>Tianjin Key Laboratory of Functional Crystal Materials, Institute of Functional Crystal, Tianjin University of Technology, Tianjin, 300384, China.

E-mail: lm8901@fjirsm.ac.cn

**Keywords:** molecular perovskite, X-ray detection, Cs-Incorporated, Orbital Degeneracy.

## Experimental:

**Materials preparation:** Ammonium bromide ( $\text{NH}_4\text{Br}$ , 99%), Cesium bromide ( $\text{CsBr}$ , 99%), Hydrobromic acid ( $\text{HBr}$ ) (40%), and Homopiperazine (HPIP, 99%) were purchased from Adamas Reagent. We confirmed that all the reagents and chemicals were used as received without further purification.

**Synthesis of HPIP-XBr<sub>3</sub> · H<sub>2</sub>O powders:** HPIP (10.008 g, 100 mmol), XBr (100 mmol), and HBr (40%, 50 mL) are dissolved in 80 mL H<sub>2</sub>O and stirred at room temperature for 12 h. Then, the mixed solution was evaporated using a rotary evaporator at 60°C, then the white product was cleaned with ethanol three times. Finally, the white product was dried for 24 hours at 50°C in a vacuum oven.

**Synthesis of HPIP-XBr<sub>3</sub> · H<sub>2</sub>O SCs:** The HPIP-XBr<sub>3</sub> · H<sub>2</sub>O SCs were grown by dissolving the HPIP-XBr<sub>3</sub> · H<sub>2</sub>O powders into the H<sub>2</sub>O to form a saturated solution. Then, the impurities in the mixture solution were removed by filter, and transferred into a crystallizing dish for holding at a constant temperature (35°C) in the oven for several days to obtain HPIP-XBr<sub>3</sub> · H<sub>2</sub>O single crystals.

**Single-Crystal Structure Determination:** Single-crystal X-ray diffraction (SC-XRD) data were performed on a Rigaku Mercury CCD diffractometer equipped with graphite-monochromatic Cu-K $\alpha$  radiation ( $\lambda = 1.54184\text{\AA}$ ) and Mo-K $\alpha$  radiation ( $\lambda = 0.7103\text{\AA}$ ). The crystal structure of HPIP-XBr<sub>3</sub> · H<sub>2</sub>O was solved by using the ShelXT and then refined by the ShelXL on OLEX2 package 1.2. The program PLATON2 was used to check for the structure. Crystallographic data and structure refinements of HPIP-XBr<sub>3</sub> · H<sub>2</sub>O were given in Table S3.

**Powder X-ray diffraction (PXRD):** The PXRD data of HPIP-XBr<sub>3</sub> · H<sub>2</sub>O were measured on a Miniflex600 powder X-ray diffractometer with Cu K $\alpha$  radiation ( $\lambda = 1.54184\text{\AA}$ ) in the  $2\theta$  range from 10 to 60°.

**Nuclear Magnetic Resonance (NMR):** NMR was performed using AVANCE III 400 with a frequency of 400 MHz, and deuterated DMSO was used as a solvent.

**Energy-dispersive X-ray Spectroscopy Analysis:** Microprobe elemental analyses were recorded on a field emission scanning electron microscope (FESEM, SU-8010) with an energy-dispersive X-ray spectroscope (EDS).

**Thermal analysis:** Thermogravimetric Analysis (TGA) was performed on a Netzsch STA449F3 simultaneous analyzer under flowing N<sub>2</sub> at a rate of 10 °C·min<sup>-1</sup>.

**UV-Vis-NIR Diffuse Reflectance Spectrum and Transmission Spectrum:** The UV-Vis-NIR transmission Spectrum of HPIP-NH<sub>4</sub>Br<sub>3</sub> · H<sub>2</sub>O and HPIP-(NH<sub>4</sub>)<sub>0.7</sub>Cs<sub>0.3</sub>Br<sub>3</sub> · H<sub>2</sub>O were measured on PerkinElmer Lambda950 UV/vis/NIR spectrophotometer. The UV-Vis-NIR Diffuse Reflectance Spectrum of HPIP-CsBr<sub>3</sub> · H<sub>2</sub>O was measured on PerkinElmer Lambda950 UV/vis/NIR spectrophotometer. BaSO<sub>4</sub> was used as standard.

## First-principles calculations:

All DFT calculations were performed with the CP2K package<sup>[1]</sup>. We use a Gaussian and augmented

plane waves (GAPW)<sup>[2]</sup> scheme, in which, the electronic density is expanded in the form of plane waves with a cutoff of 400 Ry. The PBE as the exchange and correlation functional and the core electrons treated as the Geodecker, Teter and Hutter pseudopotentials<sup>[3]</sup> were used in the calculations. Double-zeta split valance basis sets are used for all atomic kinds. In addition, Grimme's empirical dispersion corrections are also included<sup>[4]</sup>. The IGHM<sup>[5,6]</sup> figure is depicted using Multiwfn<sup>[7]</sup> and VMD software<sup>[8]</sup>.

## Device parameters:

**Device fabrication preparation for X-ray detector and imager:** For the detector, the vacuum evaporation method deposited a thickness of 200 nm Ag electrodes on HPIP-XBr<sub>3</sub> H<sub>2</sub>O SCs. The electrode area is 0.0020 cm<sup>2</sup> with a space of 150 μm.

**μτ product calculation:** In this work, a device structure of Ag/ HPIP-XBr<sub>3</sub> H<sub>2</sub>O SCs/Ag was used for photoconductivity measurement. Then, the simplified Hecht equation was utilized to extract the μτ product from photoconductivity curves, as follows:

$$I = \frac{I_0 \mu \tau V}{d^2} \left[ 1 - \exp\left(-\frac{d^2}{\mu \tau V}\right) \right]$$

where  $I_0$  is the saturated photoinduced current,  $V$  is the bias voltage, and  $d$  is the device thickness.

**Gain factor calculation:** The gain factor can be calculated as follows:<sup>[9]</sup>

$$\text{Gain factor} = \frac{I_R}{I_P}$$

where  $I_R$  and  $I_P$  stand for induced photocurrent and theoretical photocurrent under X-ray illumination.  $I_R$  can be obtained in the experiment, while  $I_P$  should calculate as  $I_P = \varphi \beta e$ .

The  $\varphi$  (photon absorption rate) is defined as:

$$\varphi = \frac{\epsilon D m_s}{E_{ph}}$$

where  $\beta$  (the number of excited carriers per X-ray photon) is defined as  $\beta = \frac{E_{ph}}{W_{\pm}}$ . Notably,  $e$  represents electric charge,  $\epsilon$  the fraction of photons in the sample (typically defined as 1),  $D$  the dose rate,  $m_s$  the mass of the sample and  $E_{ph}$  X-ray energy.  $W_{\pm}$  is the e-h pair creation energy, which is calculated by  $W_{\pm} = 1.43 + 2Eg$ .

**Signal-to-noise ratio (SNR) calculation:** The SNR is calculated according to the relation:  $SNR = I_{signal}/I_{noise}$ , where the signal current ( $I_{signal}$ ) is the difference between the average photocurrent ( $I_{photo}$ ) and the average dark current ( $I_{dark}$ ), and the noise current ( $I_{noise}$ ) is obtained by calculating the standard deviation of the photocurrent.

**Dark current drift (D) calculation:** The D is calculated according to the relation  $D = |J_{finish} - J_{begin}|/(t \times E)$ , where  $t$  is duration,  $E$  is applied electric field,  $J_{finish}$  and  $J_{begin}$  represent current density at the end and beginning, respectively.

**X-ray detectors:** The X-ray detection measurements were performed on a modified Super Nova instrument. The X-ray is generated by a tungsten anode tube and is operated with a constant 40 keV

acceleration voltage. Operational current can be easily tuned from 5 to 40  $\mu\text{A}$  to adjust the emitted X-ray dose rate. All the X-ray response characterization was conducted in a dark ambient atmosphere by dark curtain, the photocurrent was recorded by a high-precision electrometer (Keithley 6517B). All measurements were performed at room temperature.

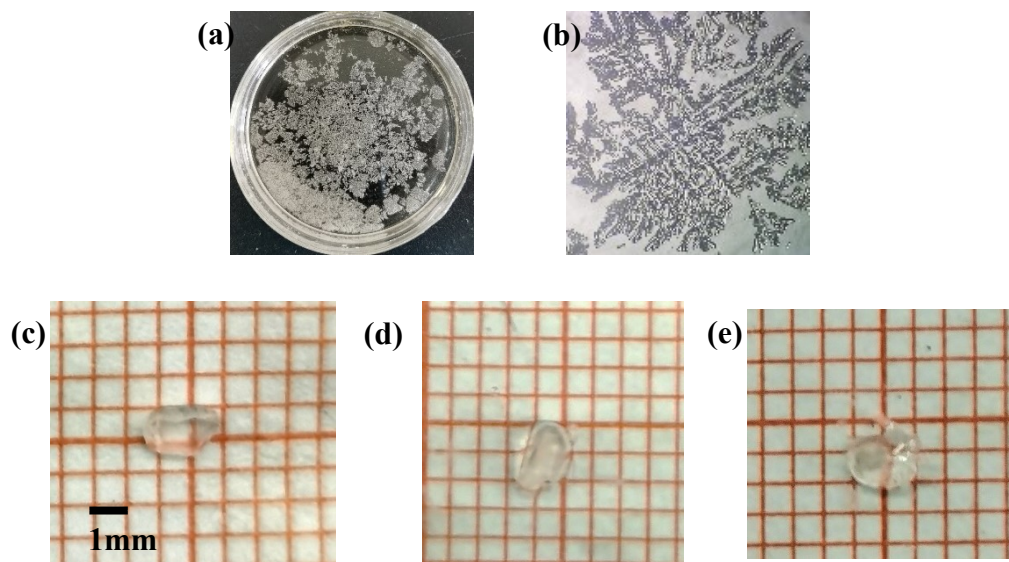

**Figure S1.** (a) Optical photo and (b) microscope photo of dendrites grown by HPIP-CsBr<sub>3</sub>. (c) Optical photo of HPIP-CsBr<sub>3</sub> SC and placed in the natural environment for (d) 3 days and (e) 7 days.

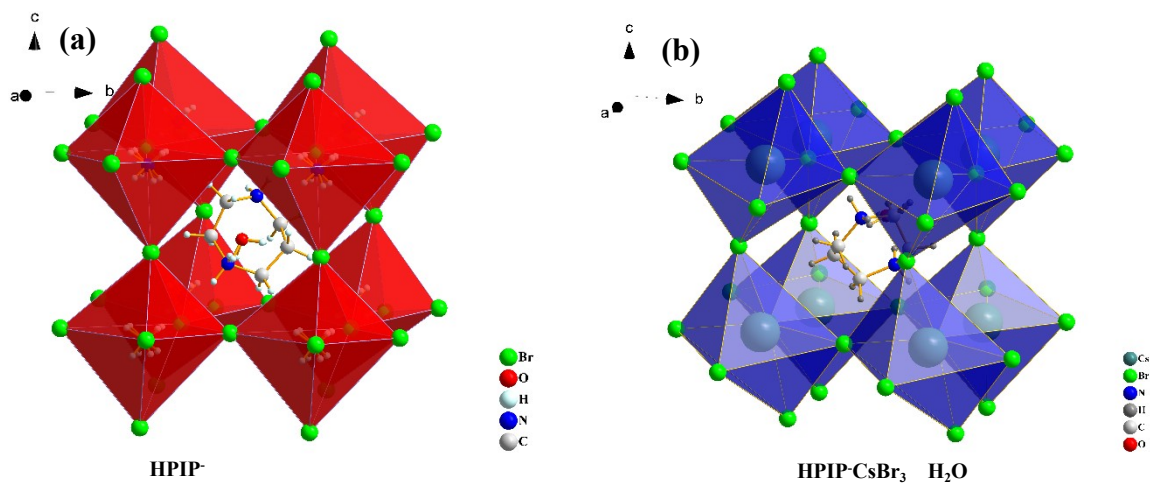

**Figure S2.** Crystal structure of (a) HPIP·NH<sub>4</sub>Br<sub>3</sub> · H<sub>2</sub>O and (b) HPIP·CsBr<sub>3</sub> · H<sub>2</sub>O.

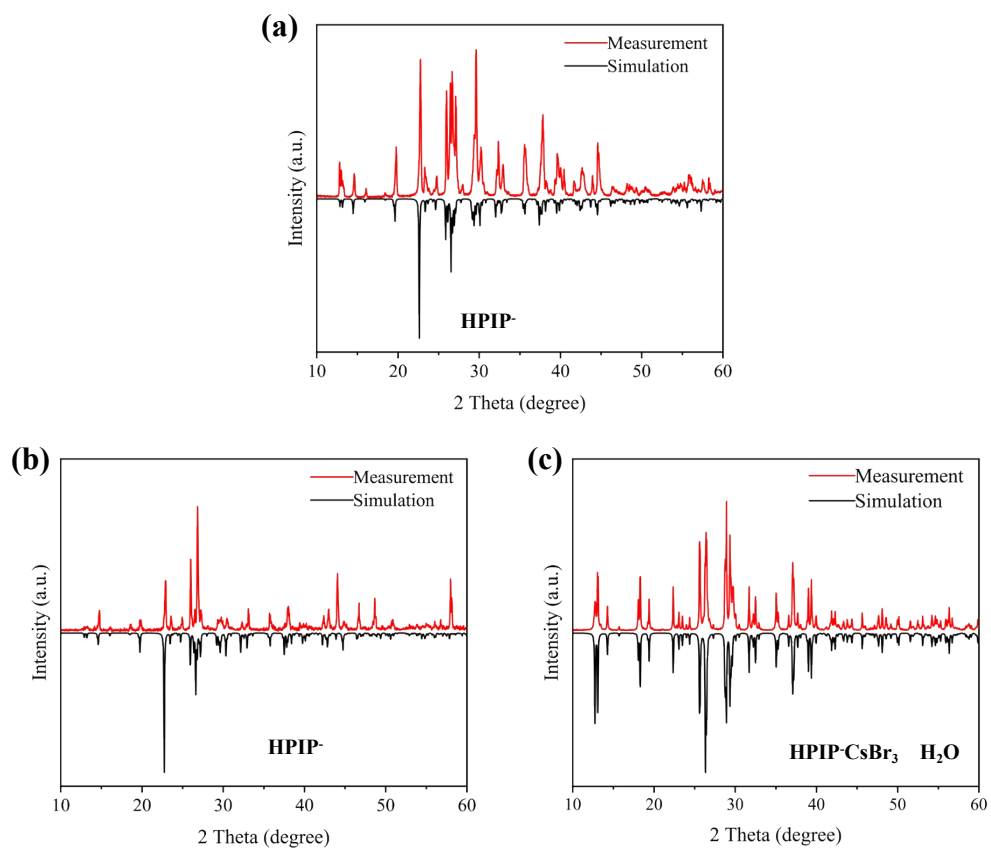

**Figure S3.** Calculated and experimental powder X-ray diffraction patterns of (a) HPIP· $(\text{NH}_4)_{0.7}\text{Cs}_{0.3}\text{Br}_3 \cdot \text{H}_2\text{O}$ , (b) HPIP· $\text{NH}_4\text{Br}_3 \cdot \text{H}_2\text{O}$ , and (c) HPIP· $\text{CsBr}_3 \cdot \text{H}_2\text{O}$ .

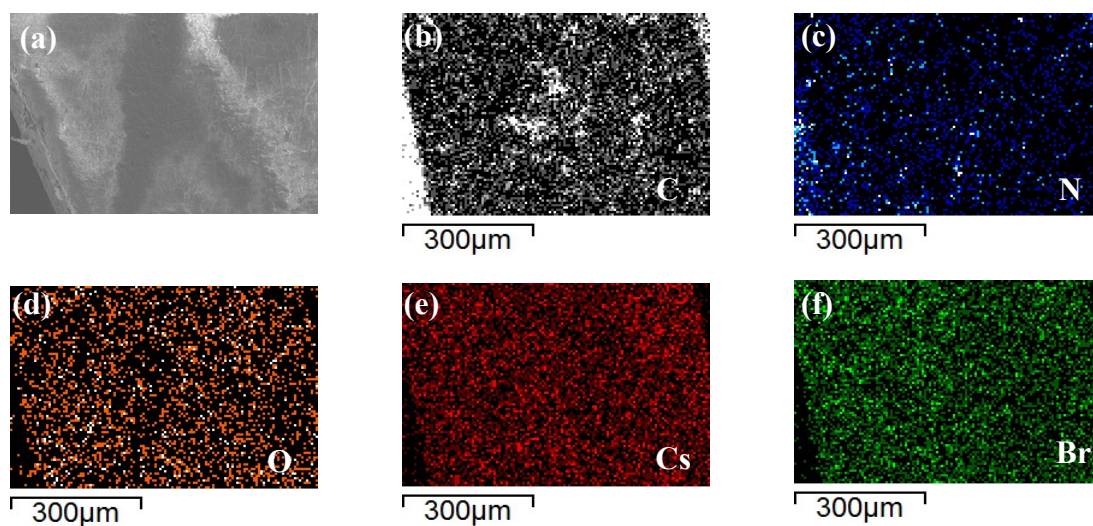

**Figure S4.** Element analysis of HPIP· $(\text{NH}_4)_{0.7}\text{Cs}_{0.3}\text{Br}_3 \cdot \text{H}_2\text{O}$  SC: (a) SEM images and (b-f) the energy-dispersive spectrometric mapping.

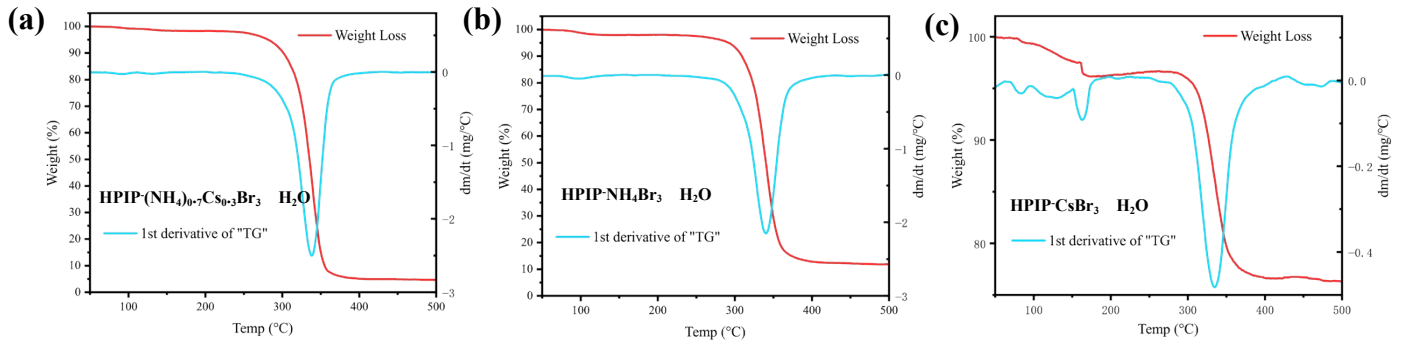

**Figure S5.** TG characterization of (a)  $\text{HPIP}(\text{NH}_4)_{0.7}\text{Cs}_{0.3}\text{Br}_3 \cdot \text{H}_2\text{O}$ , (b)  $\text{HPIP-NH}_4\text{Br}_3 \cdot \text{H}_2\text{O}$ , and (c)  $\text{HPIP-CsBr}_3 \cdot \text{H}_2\text{O}$ .

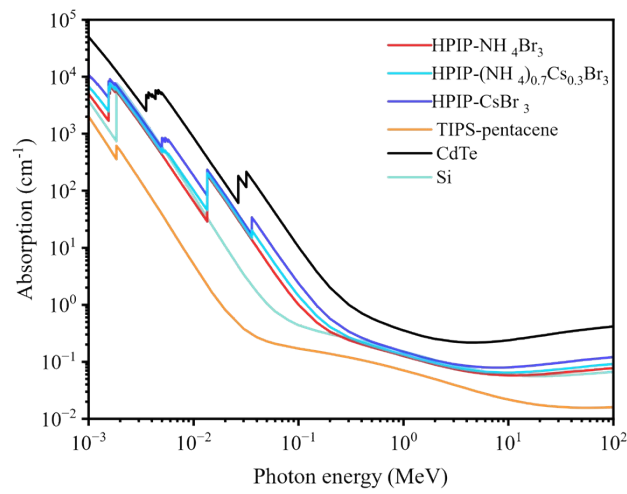

**Figure S6.** Absorption coefficients of  $\text{HPIP-CsBr}_3 \cdot \text{H}_2\text{O}$ , CdTe, TIPS-pentacene, and Si over a wide range of photon energies.

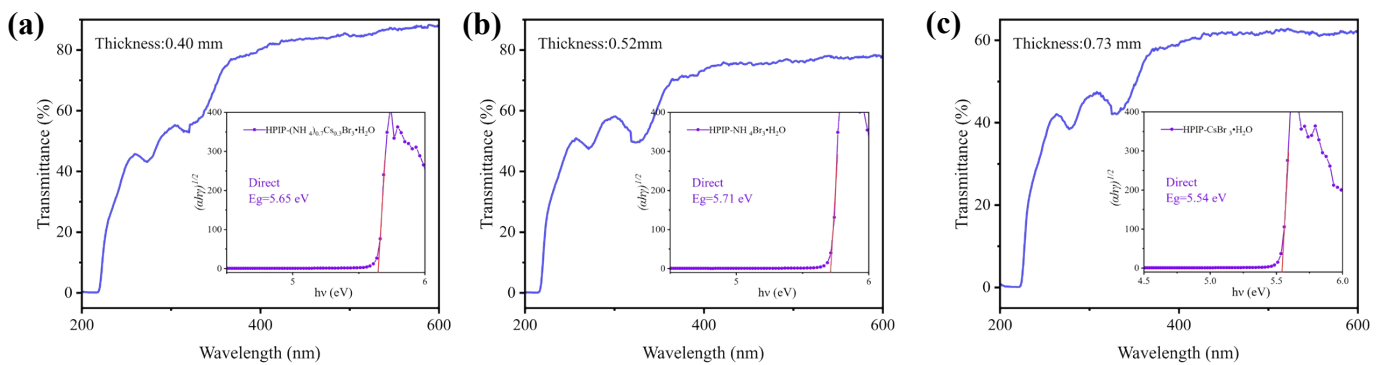

**Figure S7.** The transmittance spectrum and Tauc plot for an indirect band gap of (a)  $\text{HPIP}(\text{NH}_4)_{0.7}\text{Cs}_{0.3}\text{Br}_3 \cdot \text{H}_2\text{O}$ , (b)  $\text{HPIP-NH}_4\text{Br}_3 \cdot \text{H}_2\text{O}$ , and (c)  $\text{HPIP-CsBr}_3 \cdot \text{H}_2\text{O}$ .

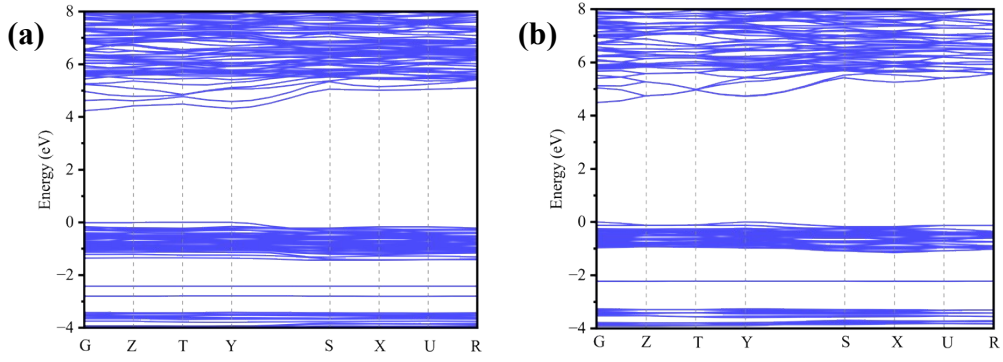

**Figure S8.** The band gap of (a) HPIP-NH<sub>4</sub>Br<sub>3</sub> · H<sub>2</sub>O and (b) HPIP-CsBr<sub>3</sub> · H<sub>2</sub>O.

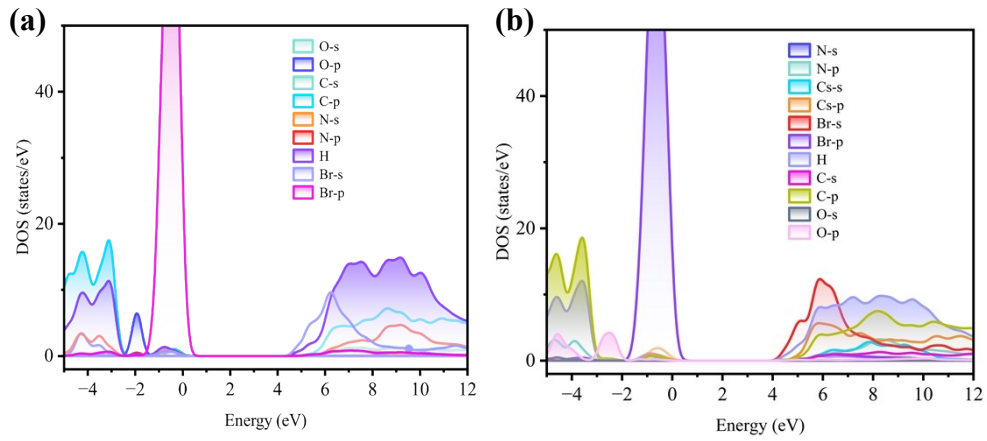

**Figure S9.** Electronic density of states for HPIP-NH<sub>4</sub>Br<sub>3</sub> · H<sub>2</sub>O: (a) HPIP-NH<sub>4</sub>Br<sub>3</sub> · H<sub>2</sub>O, and (b) HPIP-CsBr<sub>3</sub> · H<sub>2</sub>O.

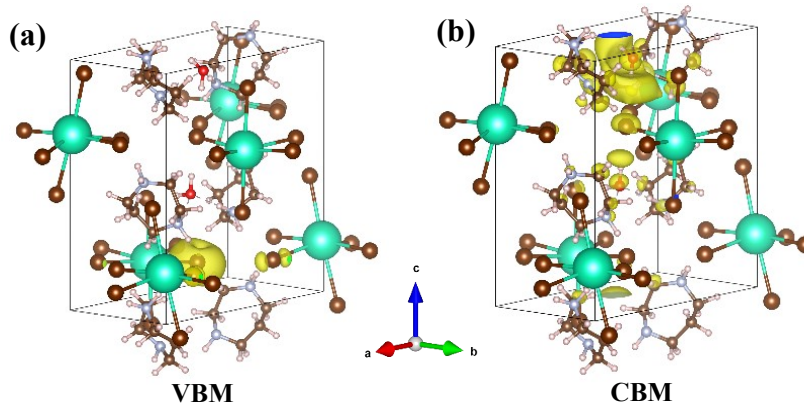

**Figure S10.** Band nature of HPIP-CsBr<sub>3</sub> · H<sub>2</sub>O: the charge-density distributions for (a) VBM and (b) CBM.

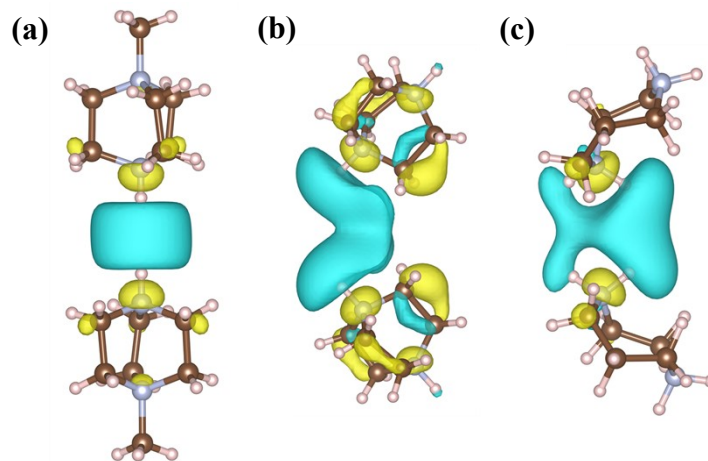

**Figure S11.** The lowest unoccupied molecular orbital between a) MDABCO, b) DABCO and c) HPIP molecules.

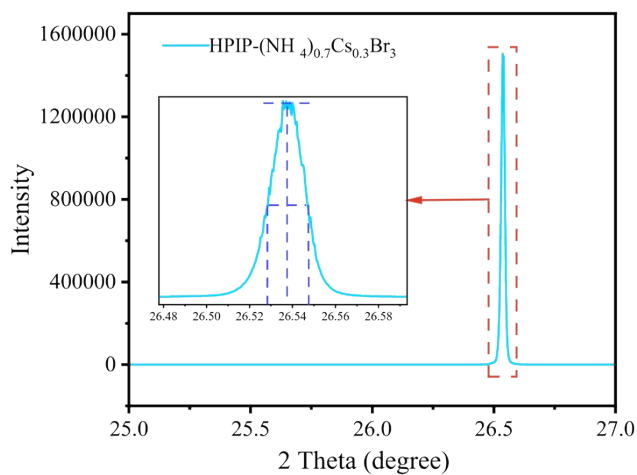

**Figure S12** X-ray rocking curve of the HPIP-(NH<sub>4</sub>)<sub>0.7</sub>Cs<sub>0.3</sub>Br<sub>3</sub>·H<sub>2</sub>O crystal

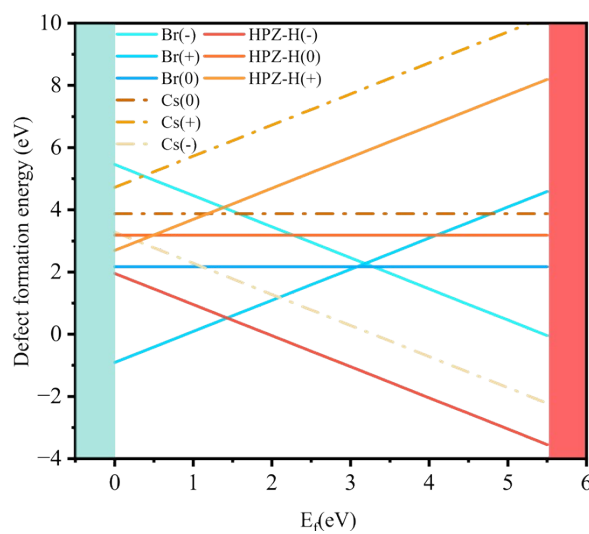

**Figure S13.** The defect formation energy of HPIP·CsBr<sub>3</sub>·H<sub>2</sub>O with different components.



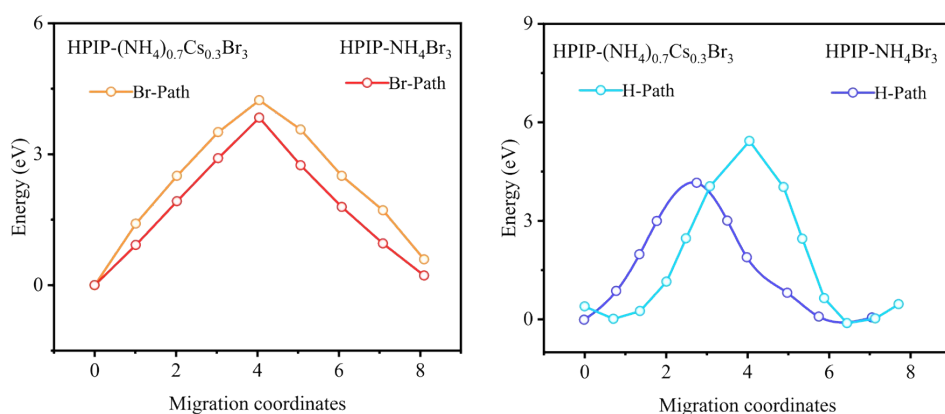

**Figure S14** Ionic migration energy of Br and H ions in  $\text{NH}_4/\text{Cs}$  and  $\text{NH}_4$ -based crystals

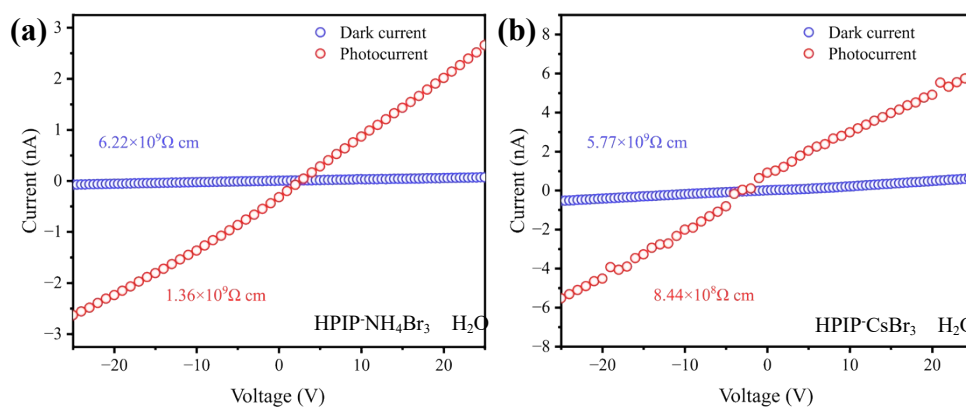

**Figure S15.** The resistivity of (a)  $\text{HPIP-NH}_4\text{Br}_3 \cdot \text{H}_2\text{O}$ , and (b)  $\text{HPIP-CsBr}_3 \cdot \text{H}_2\text{O}$ .

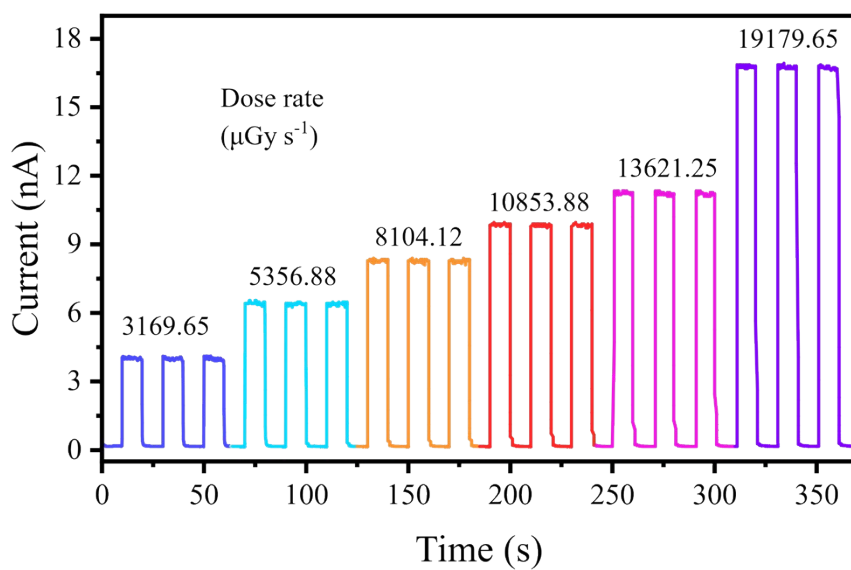

**Figure S16.** Photocurrent response versus time under different dose rates.

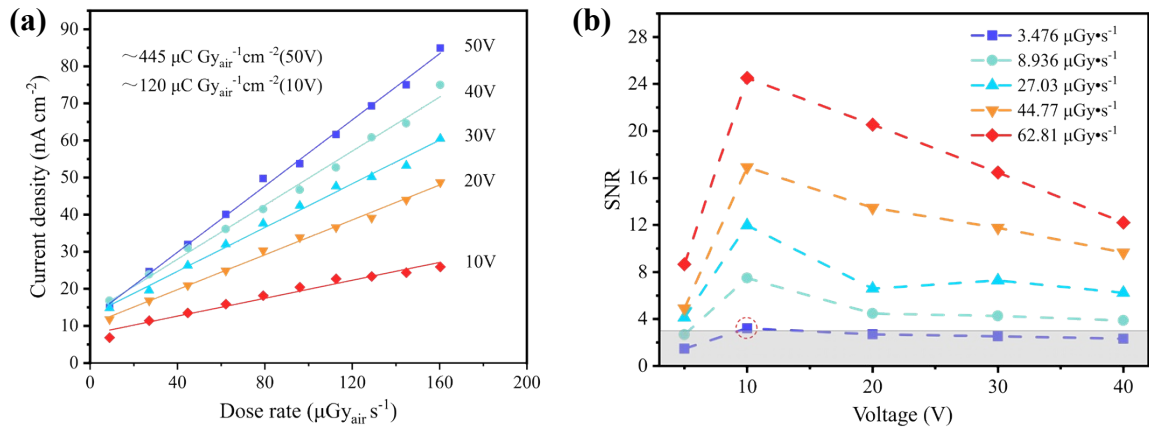

**Figure S17.** Device performance of HPIP-NH<sub>4</sub>Br<sub>3</sub> H<sub>2</sub>O SC-based device: (a) X-ray response of photocurrent under different bias and (b) Signal-to-noise ratio (SNR) of the device under a series of bias voltages on exposure to different dose rates.

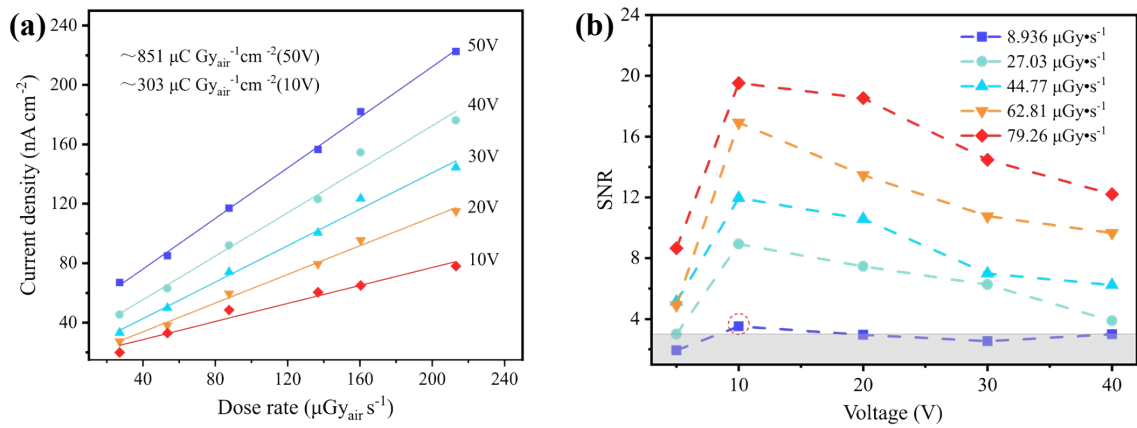

**Figure S18.** Device performance of HPIP-CsBr<sub>3</sub> H<sub>2</sub>O SC-based device: (a) X-ray response of photocurrent under different bias and (b) Signal-to-noise ratio (SNR) of the device under a series of bias voltages on exposure to different dose rates.

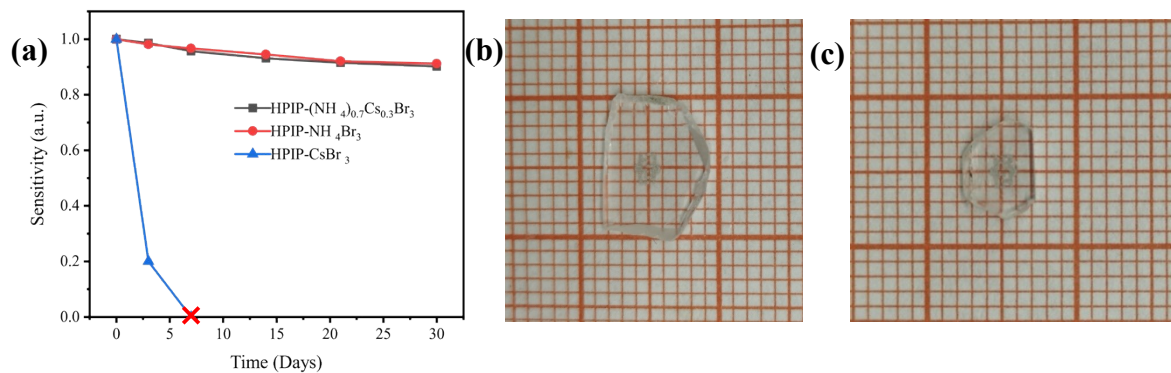

**Figure S19.** a) The long-term stability of X-ray detector under environmental conditions for 30 days. Photo of the (b) HPIP-(NH<sub>4</sub>)<sub>0.7</sub>Cs<sub>0.3</sub>Br<sub>3</sub> H<sub>2</sub>O single crystal and (c) HPIP-NH<sub>4</sub>Br<sub>3</sub> H<sub>2</sub>O single crystal under environmental conditions after 30 days.

**Table S1.** Crystal Data and Structure Refinement of HPIP-XBr<sub>3</sub> H<sub>2</sub>O

| Compound                | HPIP-NH <sub>4</sub> Br <sub>3</sub> H <sub>2</sub> O                            | HPIP-(NH <sub>4</sub> ) <sub>0.7</sub> Cs <sub>0.3</sub> Br <sub>3</sub> H <sub>2</sub> O                            | HPIP-CsBr <sub>3</sub> H <sub>2</sub> O                                   |
|-------------------------|----------------------------------------------------------------------------------|----------------------------------------------------------------------------------------------------------------------|---------------------------------------------------------------------------|
| Formula                 | (C <sub>5</sub> H <sub>14</sub> N <sub>2</sub> )-NH <sub>4</sub> Br <sub>3</sub> | (C <sub>5</sub> H <sub>14</sub> N <sub>2</sub> )-(NH <sub>4</sub> ) <sub>0.7</sub> Cs <sub>0.3</sub> Br <sub>3</sub> | (C <sub>5</sub> H <sub>14</sub> N <sub>2</sub> )-CsBr <sub>3</sub>        |
| Formula weight          | 372.99                                                                           | 405.64                                                                                                               | 967.66                                                                    |
| Temperature             | 287.15 K                                                                         | 293(2) K                                                                                                             | 297.15 K                                                                  |
| Wavelength              | 0.71073 Å                                                                        | 1.54184 Å                                                                                                            | 0.71073 Å                                                                 |
| Crystal system          | Orthorhombic                                                                     | Orthorhombic                                                                                                         | Orthorhombic                                                              |
| space group             | Pmc2(1)                                                                          | Pmc2(1)                                                                                                              | Pmc2(1)                                                                   |
| Unit cell               | a = 13.3845(9) Å α=90°<br>b = 6.7534(5) Å β=90°<br>c = 13.7252(9) Å γ=90°        | a = 13.4298(3) Å α=90°<br>b = 6.81540(10) Å β=90°<br>c = 13.7663(3) Å γ=90°                                          | a = 13.5281(5) Å α=90°<br>b = 6.9306(2) Å β=90°<br>c = 13.9050(5) Å γ=90° |
| Volume(Å <sup>3</sup> ) | 1240.63(15)                                                                      | 1260.02(4)                                                                                                           | 1303.70(8)                                                                |
| Z                       | 4                                                                                | 4                                                                                                                    | 2                                                                         |
| Calculated density      | 1.997 g/cm <sup>3</sup>                                                          | 2.138 g/cm <sup>3</sup>                                                                                              | 2.465 g/cm <sup>3</sup>                                                   |
| F(000)                  | 732                                                                              | 778                                                                                                                  | 892                                                                       |
| GOF on F <sup>2</sup>   | 0.976                                                                            | 1.068                                                                                                                | 1.048                                                                     |
| R/wR (I>2 σ(I))         | R <sub>1</sub> = 0.0430, wR <sub>2</sub> = 0.0925                                | R <sub>1</sub> = 0.0567, wR <sub>2</sub> = 0.1484                                                                    | R <sub>1</sub> = 0.0206, wR <sub>2</sub> = 0.0428                         |
| R/wR (all data)         | R <sub>1</sub> = 0.0580, wR <sub>2</sub> = 0.0966                                | R <sub>1</sub> = 0.0572, wR <sub>2</sub> = 0.1495                                                                    | R <sub>1</sub> = 0.0251, wR <sub>2</sub> = 0.0438                         |

$$^aR(F) = \Sigma||F_o| - |F_c||/\Sigma|F_o| \cdot wR(F_o^2) = [\Sigma w(F_o^2 - F_c^2)^2 / \Sigma w(F_o^2)^2]^{1/2} [10]$$

**Table S2.** Summary of Br-Br and Br-X bond lengths.

| HPIP-NH <sub>4</sub> Br <sub>3</sub> H <sub>2</sub> O | HPIP-(NH <sub>4</sub> ) <sub>0.7</sub> Cs <sub>0.3</sub> Br <sub>3</sub> H <sub>2</sub> O | HPIP-CsBr <sub>3</sub> H <sub>2</sub> O |
|-------------------------------------------------------|-------------------------------------------------------------------------------------------|-----------------------------------------|
| label                                                 | label                                                                                     | label                                   |
| Distances (Å)                                         | Distances (Å)                                                                             | Distances (Å)                           |
| Br01-Br02                                             | Br03-Br01                                                                                 | Br3-Br4                                 |
| 5.544                                                 | 5.572                                                                                     | 4.034                                   |
| Br02-Br01                                             | Br01-Br03                                                                                 | Br1-Br                                  |
| 5.46                                                  | 5.542                                                                                     | 4.275                                   |
| Br04-Br03                                             | Br04-Br02                                                                                 | Br-Br3                                  |
| 5.294                                                 | 5.337                                                                                     | 4.394                                   |
| Br02-Br04                                             | Br03-Br04                                                                                 | Br4-Br3                                 |
| 5.287                                                 | 5.328                                                                                     | 4.486                                   |
| Br03-Br05                                             | Br01-Br04                                                                                 | Br1-Br2                                 |
| 5.203                                                 | 5.268                                                                                     | 4.514                                   |
| Br04-Br01                                             | Br02-Br05                                                                                 | Br2-Br                                  |
| 5.195                                                 | 5.224                                                                                     | 4.677                                   |
| Br04-Br05                                             | Br04-Br05                                                                                 | Br4-Br                                  |
| 5.123                                                 | 5.124                                                                                     | 4.734                                   |
| Br03-Br05                                             | Br05-Br02                                                                                 | Br2-Br1                                 |
| 4.953                                                 | 4.972                                                                                     | 4.836                                   |
| Br05-Br03                                             | Br05-Br02                                                                                 | Br1-Br2                                 |
| 4.719                                                 | 4.755                                                                                     | 5.045                                   |
| Br04-Br02                                             | Br03-Br04                                                                                 | Br-Br2                                  |
| 4.636                                                 | 4.67                                                                                      | 5.183                                   |
| Br04-Br05                                             | Br05-Br04                                                                                 | Br1-Br2                                 |
| 4.593                                                 | 4.609                                                                                     | 5.269                                   |
| Br03-Br05                                             | Br02-Br05                                                                                 | Br4-Br                                  |
| 4.416                                                 | 4.455                                                                                     | 5.384                                   |
| Br01-Br02                                             | Br03-Br01                                                                                 | Br3-Br                                  |
| 4.4                                                   | 4.421                                                                                     | 5.392                                   |
| Br01-Br04                                             | Br04-Br01                                                                                 | Br-Br1                                  |
| 4.399                                                 | 4.411                                                                                     | 5.49                                    |
| Br03-Br04                                             | Br02-Br04                                                                                 | Br3-Br4                                 |
| 4.278                                                 | 4.277                                                                                     | 5.65                                    |
| Br01-Br02                                             | Br01-Br03                                                                                 | Br4-Br3                                 |
| 4.04                                                  | 4.036                                                                                     | 5.682                                   |
| N00A-Br02                                             | N Cs06-Br03                                                                               | Cs00-Br1                                |
| 3.606                                                 | 3.63                                                                                      | 3.46                                    |
| Br02-N00A                                             | N Cs06-Br03                                                                               | Cs1-Br3                                 |
| 3.503                                                 | 3.515                                                                                     | 3.465                                   |
| Br05-N007                                             | N Cs06-Br04                                                                               | Cs1-Br3                                 |
| 3.459                                                 | 3.497                                                                                     | 3.475                                   |
| Br04-N00A                                             | N Cs06-Br04                                                                               | Br2-Cs00                                |
| 3.458                                                 | 3.497                                                                                     | 3.479                                   |

|           |       |               |       |          |       |
|-----------|-------|---------------|-------|----------|-------|
| Br04-N00A | 3.458 | N00 Cs00-Br02 | 3.468 | Cs00-Br2 | 3.485 |
| N007-Br04 | 3.454 | N00 Cs00-Br05 | 3.464 | Br1-Cs00 | 3.503 |
| Br04-N007 | 3.454 | N00 Cs00-Br04 | 3.454 | Cs00-Br  | 3.511 |
| Br03-N007 | 3.429 | Br04-N00 Cs00 | 3.454 | Cs00-Br  | 3.511 |
| N007-Br05 | 3.414 | N00 Cs00-Br05 | 3.431 | Br-Cs1   | 3.522 |
| Br01-N00A | 3.398 | N Cs06-Br01   | 3.428 | Cs1-Br   | 3.522 |
| N007-Br03 | 3.367 | Br01-N Cs06   | 3.396 | Br4-Cs1  | 3.598 |
| N00A-Br01 | 3.36  | N00 Cs00-Br02 | 3.379 | Cs1-Br4  | 3.642 |

**Table S3.** Summary of Br-X-Br bond angles.

| HPIP-NH <sub>4</sub> Br <sub>3</sub><br>label | H <sub>2</sub> O<br>angles (°) | HPIP-(NH <sub>4</sub> ) <sub>0.7</sub> Cs <sub>0.3</sub> Br <sub>3</sub><br>label | H <sub>2</sub> O<br>angles (°) | HPIP-CsBr <sub>3</sub><br>label | H <sub>2</sub> O<br>angles (°) |
|-----------------------------------------------|--------------------------------|-----------------------------------------------------------------------------------|--------------------------------|---------------------------------|--------------------------------|
| Br(01)-N(00A)-Br(01)                          | 174.0(6)                       | Br(01)-N Cs(06)-Br(01)                                                            | 174.30(11)                     | Br(1)-Cs(00)-Br(1)              | 168.94(3)                      |
| Br(01)-N(00A)-Br(02)                          | 79.6(3)                        | Br(01)-N Cs(06)-Br(04)                                                            | 99.68(4)                       | Br(1)-Cs(00)-Br                 | 103.907(12)                    |
| Br(01)-N(00A)-Br(02)                          | 106.4(5)                       | Br(01)-N Cs(06)-Br(04)                                                            | 79.15(4)                       | Br(1)-Cs(00)-Br                 | 75.094(12)                     |
| Br(01)-N(00A)-Br(02)                          | 70.7(9)                        | Br(01)-N Cs(06)-Br(04)                                                            | 99.68(4)                       | Br(1)-Cs(00)-Br                 | 103.907(12)                    |
| Br(01)-N(00A)-Br(02)                          | 105.3(8)                       | Br(01)-N Cs(06)-Br(04)                                                            | 79.15(4)                       | Br(1)-Cs(00)-Br                 | 75.094(12)                     |
| Br(01)-N(00A)-Br(04)                          | 99.2(3)                        | Br(04)-N Cs(06)-Br(04)                                                            | 148.65(10)                     | Br(1)-Cs(00)-Br(2)              | 93.18(2)                       |
| Br(01)-N(00A)-Br(04)                          | 79.5(3)                        | Br(01)-N Cs(06)-Br(03)                                                            | 106.59(8)                      | Br(1)-Cs(00)-Br(2)              | 88.38(2)                       |
| Br(01)-N(00A)-Br(04)                          | 99.2(3)                        | Br(01)-N Cs(06)-Br(03)                                                            | 79.10(6)                       | Br-Cs(00)-Br                    | 149.28(2)                      |
| Br(01)-N(00A)-Br(04)                          | 79.5(3)                        | Br(04)-N Cs(06)-Br(03)                                                            | 98.90(5)                       | Br(2)-Cs(00)-Br(1)              | 97.88(2)                       |
| Br(04)-N(00A)-Br(02)                          | 99.3(3)                        | Br(04)-N Cs(06)-Br(03)                                                            | 98.90(5)                       | Br(2)-Cs(00)-Br(1)              | 80.56(2)                       |
| Br(04)-N(00A)-Br(02)                          | 81.9(9)                        | Br(01)-N Cs(06)-Br(03)                                                            | 70.05(6)                       | Br(2)-Cs(00)-Br                 | 95.615(16)                     |
| Br(04)-N(00A)-Br(02)                          | 98.8(3)                        | Br(01)-N Cs(06)-Br(03)                                                            | 104.25(8)                      | Br(2)-Cs(00)-Br                 | 84.001(16)                     |
| Br(04)-N(00A)-Br(02)                          | 99.3(3)                        | Br(04)-N Cs(06)-Br(03)                                                            | 81.87(6)                       | Br(2)-Cs(00)-Br                 | 95.615(16)                     |
| Br(02)-N(00A)-Br(02)                          | 176.1(8)                       | Br(04)-N Cs(06)-Br(03)                                                            | 81.87(6)                       | Br(2)-Cs(00)-Br                 | 84.000(16)                     |
| Br(04)-N(00A)-Br(04)                          | 148.8(6)                       | Br(03)-N Cs(06)-Br(03)                                                            | 176.64(8)                      | Br(2)-Cs(00)-Br(2)              | 178.438(15)                    |
| Br(03)-N(007)-Br(03)                          | 167.2(0)                       | Br(02)-N Cs(00)-Br(05)                                                            | 88.56(10)                      | Br(3)-Cs(1)-Br(3)               | 174.18(3)                      |
| Br(03)-N(007)-Br(04)                          | 76.8(4)                        | Br(02)-N Cs(00)-Br(04)0                                                           | 102.69(6)                      | Br(3)-Cs(1)-Br(4)               | 105.07(2)                      |
| Br(03)-N(007)-Br(04)                          | 76.7(3)                        | Br(05)-N Cs(00)-Br(04)0                                                           | 84.02(8)                       | Br(3)-Cs(1)-Br(4)               | 69.11(2)                       |
| Br(03)-N(007)-Br(04)                          | 101.1(1)                       | Br(02)-N Cs(00)-Br(04)1                                                           | 102.69(6)                      | Br(3)-Cs(1)-Br(4)               | 107.11(2)                      |
| Br(03)-N(007)-Br(04)                          | 101.8(0)                       | Br(05)-N Cs(00)-Br(04)1                                                           | 84.02(8)                       | Br(3)-Cs(1)-Br(4)               | 78.71(2)                       |
| Br(03)-N(007)-Br(05)                          | 93.8(2)                        | Br(04)0-N Cs(00)-Br(04)                                                           | 151.57(13)                     | Br(3)-Cs(1)-Br                  | 101.019(12)                    |
| Br(03)-N(007)-Br(05)                          | 98.9(6)                        | Br(02)-N Cs(00)-Br(05)                                                            | 93.21(10)                      | Br(3)-Cs(1)-Br                  | 77.800(12)                     |
| Br(03)-N(007)-Br(05)                          | 79.7(4)                        | Br(05)-N Cs(00)-Br(05)                                                            | 178.23(12)                     | Br(3)-Cs(1)-Br                  | 77.800(12)                     |
| Br(03)-N(007)-Br(05)                          | 87.4(5)                        | Br(04)0-N Cs(00)-Br(05)                                                           | 95.58(8)                       | Br(3)-Cs(1)-Br                  | 101.019(12)                    |
| Br(04)-N(007)-Br(05)                          | 96.4(5)                        | Br(04)1-N Cs(00)-Br(05)                                                           | 95.58(8)                       | Br(4)-Cs(1)-Br(4)               | 176.218(18)                    |
| Br(04)-N(007)-Br(05)                          | 96.4(5)                        | Br(02)-N Cs(00)-Br(02)                                                            | 168.99(16)                     | Br-Cs(1)-Br(4)                  | 98.247(16)                     |
| Br(04)-N(007)-Br(05)                          | 83.2(7)                        | Br(05)-N Cs(00)-Br(02)                                                            | 80.43(10)                      | Br-Cs(1)-Br(4)                  | 98.247(16)                     |
| Br(04)-N(007)-Br(05)                          | 83.2(7)                        | Br(04)0-N Cs(00)-Br(02)                                                           | 76.31(6)                       | Br-Cs(1)-Br(4)                  | 82.702(16)                     |
| Br(05)-N(007)-Br(05)                          | 178.7(1)                       | Br(04)1-N Cs(00)-Br(02)                                                           | 76.31(6)                       | Br-Cs(1)-Br(4)                  | 82.702(16)                     |
| Br(04)-N(007)-Br(04)                          | 152.1(6)                       | Br(05)0-N Cs(00)-Br(02)                                                           | 97.81(11)                      | Br-Cs(1)-Br                     | 147.10(3)                      |

**Table S4.** Ion radius in the HPIP-XBr<sub>3</sub> H<sub>2</sub>O.

| Ions        | HPIP <sup>2+</sup> | NH <sub>4</sub> <sup>+</sup> | Cs <sup>+</sup> | Br <sup>-</sup> |
|-------------|--------------------|------------------------------|-----------------|-----------------|
| Radius (pm) | 241                | 146                          | 168             | 196             |

**Table S5.** Calculated Goldschmidt Tolerance Factor (*t*) for HPIP-XBr<sub>3</sub> H<sub>2</sub>O

| Compound | HPIP-NH <sub>4</sub> Br <sub>3</sub> | HPIP-(NH <sub>4</sub> ) <sub>0.7</sub> Cs <sub>0.3</sub> Br <sub>3</sub> | HPIP-CsBr <sub>3</sub> |
|----------|--------------------------------------|--------------------------------------------------------------------------|------------------------|
| <i>t</i> | 0.91                                 | 0.89                                                                     | 0.84                   |

**Table S6.** Summary of the X-ray detection performance of several single crystal-based detectors.

| Materials                                                                                 | Sensitivity                                                                   | Detection limit          | Ref.        |
|-------------------------------------------------------------------------------------------|-------------------------------------------------------------------------------|--------------------------|-------------|
| MA <sub>3</sub> Bi <sub>2</sub> I <sub>9</sub>                                            | 1947 μC·Gyair <sup>-1</sup> ·cm <sup>-2</sup> at 60 V·mm <sup>-1</sup>        | 83 nGy·s <sup>-1</sup>   | [11]        |
| MA <sub>3</sub> Bi <sub>2</sub> I <sub>9</sub>                                            | 10620 μC·Gyair <sup>-1</sup> ·cm <sup>-2</sup> at 48 V·mm <sup>-1</sup>       | N/A                      | [12]        |
| Rb <sub>3</sub> Bi <sub>2</sub> I <sub>9</sub>                                            | 159.7 μC·Gyair <sup>-1</sup> ·cm <sup>-2</sup> at 300 V·mm <sup>-1</sup>      | 8.32 nGy·s <sup>-1</sup> | [13]        |
| MAPbBr <sub>3</sub> with MoO <sub>3</sub>                                                 | 2552 μC·Gyair <sup>-1</sup> ·cm <sup>-2</sup> at 4.5 V·mm <sup>-1</sup>       | N/A                      | [14]        |
| MA <sub>x</sub> Cs <sub>1-x</sub> PbBr <sub>3</sub>                                       | 2017 μC·Gyair <sup>-1</sup> ·cm <sup>-2</sup> at 0.5 V·mm <sup>-1</sup>       | 1200 nGy·s <sup>-1</sup> | [15]        |
| Cuboid MAPbI <sub>3</sub>                                                                 | 968.9 μC·Gyair <sup>-1</sup> ·cm <sup>-2</sup> at 1 V·mm <sup>-1</sup>        | N/A                      | [16]        |
| FAPbBr <sub>3</sub>                                                                       | 130 μC·Gyair <sup>-1</sup> ·cm <sup>-2</sup> at 0.5 V·mm <sup>-1</sup>        | 300 nGy·s <sup>-1</sup>  | [17]        |
| DABCO-NH <sub>4</sub> Br <sub>3</sub>                                                     | 173-176 μC·Gyair <sup>-1</sup> ·cm <sup>-2</sup> at 1250 V·mm <sup>-1</sup>   | 4960 nGy·s <sup>-1</sup> | [18]        |
| DABCO-NH <sub>4</sub> Cl <sub>3</sub>                                                     | 165 μC·Gyair <sup>-1</sup> ·cm <sup>-2</sup> at 1250 V·mm <sup>-1</sup>       | N/A                      | [18]        |
| DABCO-NH <sub>4</sub> I <sub>3</sub>                                                      | 567 μC·Gyair <sup>-1</sup> ·cm <sup>-2</sup> at 1250 V·mm <sup>-1</sup>       | N/A                      | [18]        |
| MDABCO-NH <sub>4</sub> I <sub>3</sub>                                                     | 1997 ± 80 μC·Gyair <sup>-1</sup> ·cm <sup>-2</sup> at 1250 V·mm <sup>-1</sup> | N/A                      | [19]        |
| DABCO-CsBr <sub>3</sub>                                                                   | 1345 μC·Gyair <sup>-1</sup> ·cm <sup>-2</sup> at 5000 V·mm <sup>-1</sup>      | 445 nGy·s <sup>-1</sup>  | [20]        |
| MDABCO-NH <sub>4</sub> (PF <sub>6</sub> ) <sub>3</sub>                                    | 2078 μC·Gyair <sup>-1</sup> ·cm <sup>-2</sup> at 330 V·mm <sup>-1</sup>       | 16.3 nGy·s <sup>-1</sup> | [21]        |
| DABCO-N <sub>2</sub> H <sub>5</sub> Br <sub>3</sub>                                       | 1142±10.3 μC·Gyair <sup>-1</sup> ·cm <sup>-2</sup> at 200 V·mm <sup>-1</sup>  | 2680 nGy·s <sup>-1</sup> | [22]        |
| DABCO-N <sub>2</sub> H <sub>5</sub> I <sub>3</sub>                                        | 1186±9.6 μC·Gyair <sup>-1</sup> ·cm <sup>-2</sup> at 200 V·mm <sup>-1</sup>   | 2880 nGy·s <sup>-1</sup> | [22]        |
| HPIP-NH <sub>4</sub> Br <sub>3</sub> H <sub>2</sub> O                                     | 445 μC·Gyair <sup>-1</sup> ·cm <sup>-2</sup> at 333 V·mm <sup>-1</sup>        | 3476 nGy·s <sup>-1</sup> |             |
| HPIP-CsBr <sub>3</sub> H <sub>2</sub> O                                                   | 874 μC·Gyair <sup>-1</sup> ·cm <sup>-2</sup> at 333 V·mm <sup>-1</sup>        | 8920 nGy·s <sup>-1</sup> | <b>This</b> |
| HPIP-(NH <sub>4</sub> ) <sub>0.7</sub> Cs <sub>0.3</sub> Br <sub>3</sub> H <sub>2</sub> O | 1661 μC·Gyair <sup>-1</sup> ·cm <sup>-2</sup> at 333 V·mm <sup>-1</sup>       | 402 nGy·s <sup>-1</sup>  | <b>Work</b> |

## References

- [1] J. VandeVondele, M. Krack, F. Mohamed, M. Parrinello, T. Chassaing, J. Hutter, *Comput. Phys. Commun.* **2005**, *167*, 103.
- [2] M. Iannuzzi, J. Hutter, *Phys. Chem. Chem. Phys.* **2007**, *9*, 1599.
- [3] S. Goedecker, M. Teter, J. Hutter, *Phys. Rev. B* **1996**, *54*, 1703.
- [4] E. R. Johnson, S. Keinan, P. Mori-Sánchez, J. Contreras-García, A. J. Cohen, W. Yang, *J. Am. Chem. Soc.* **2010**, *132*, 6498.
- [5] T. Lu, Q. Chen, *J. Comput. Chem.* **2022**, *43*, 539.
- [6] S. Grimme, J. Antony, S. Ehrlich, H. Krieg, *J. Chem. Phys.* **2010**, *132*, 154104.
- [7] T. Lu, F. Chen, *J. Comput. Chem.* **2012**, *33*, 580.
- [8] W. Humphrey, A. Dalke, K. Schulten, *J. Mol. Graph.* **1996**, *14*, 33.
- [9] W. Pan, H. Wu, J. Luo, Z. Deng, C. Ge, C. Chen, X. Jiang, W.-J. Yin, G. Niu, L. Zhu, L. Yin, Y. Zhou, Q. Xie, X. Ke, M. Sui, J. Tang, *Nat. Photonics* **2017**, *11*, 726.
- [10] G. M. Sheldrick, *Acta Crystallogr. A* **2008**, *64*, 112.
- [11] Y. Liu, Z. Xu, Z. Yang, Y. Zhang, J. Cui, Y. He, H. Ye, K. Zhao, H. Sun, R. Lu, M. Liu, M. G. Kanatzidis, S. (Frank) Liu, *Matter* **2020**, *3*, 180.
- [12] X. Zheng, W. Zhao, P. Wang, H. Tan, M. I. Saidaminov, S. Tie, L. Chen, Y. Peng, J. Long, W.-H. Zhang, *J. Energy Chem.* **2020**, *49*, 299.
- [13] M. Xia, J. Yuan, G. Niu, X. Du, L. Yin, W. Pan, J. Luo, Z. Li, H. Zhao, K. Xue, X. Miao, J. Tang, *Adv. Funct. Mater.* **2020**, *30*, 1910648.
- [14] Z. Fan, J. Liu, W. Zuo, G. Liu, X. He, K. Luo, Q. Ye, C. Liao, *Phys. Status Solidi A* **2020**, *217*, 2000104.
- [15] Z. Fan, J. Liu, W. Zuo, G. Liu, X. He, K. Luo, Q. Ye, C. Liao, *Phys. Status Solidi RRL – Rapid Res. Lett.* **2020**, *14*, 2000226.
- [16] F. Ye, H. Lin, H. Wu, L. Zhu, Z. Huang, D. Ouyang, G. Niu, W. C. H. Choy, *Adv. Funct. Mater.* **2019**, *29*, 1806984.
- [17] M. Yao, J. Jiang, D. Xin, Y. Ma, W. Wei, X. Zheng, L. Shen, *Nano Lett.* **2021**, *21*, 3947.
- [18] Q. Cui, X. Song, Y. Liu, Z. Xu, H. Ye, Z. Yang, K. Zhao, S. (Frank) Liu, *Matter* **2021**, *4*, 2490.
- [19] X. Song, Q. Li, J. Han, C. Ma, Z. Xu, H. Li, P. Wang, Z. Yang, Q. Cui, L. Gao, Z. Quan, S. (Frank) Liu, K. Zhao, *Adv. Mater.* **2021**, *33*, 2102190.
- [20] Q. Cui, N. Bu, X. Liu, H. Li, Z. Xu, X. Song, K. Zhao, S. F. Liu, *Nano Lett.* **2022**, *22*, 5973.
- [21] Z. Li, Z. Li, G. Peng, C. Shi, H. Wang, S. Ding, Q. Wang, Z. Liu, Z. Jin, *Adv. Mater.* **2023**, 2300480.
- [22] X. Song, H. Cohen, J. Yin, H. Li, J. Wang, Y. Yuan, R. Huang, Q. Cui, C. Ma, S. (Frank) Liu, G. Hodes, K. Zhao, *Small* **2023**, *19*, 2300892.
